# Supplementary material
Source: PubMed Central journal article supplement (PMC7529977)
Supplement: NIHMS1609348-supplement-1.pdf [file NIHMS1609348-supplement-1.pdf]

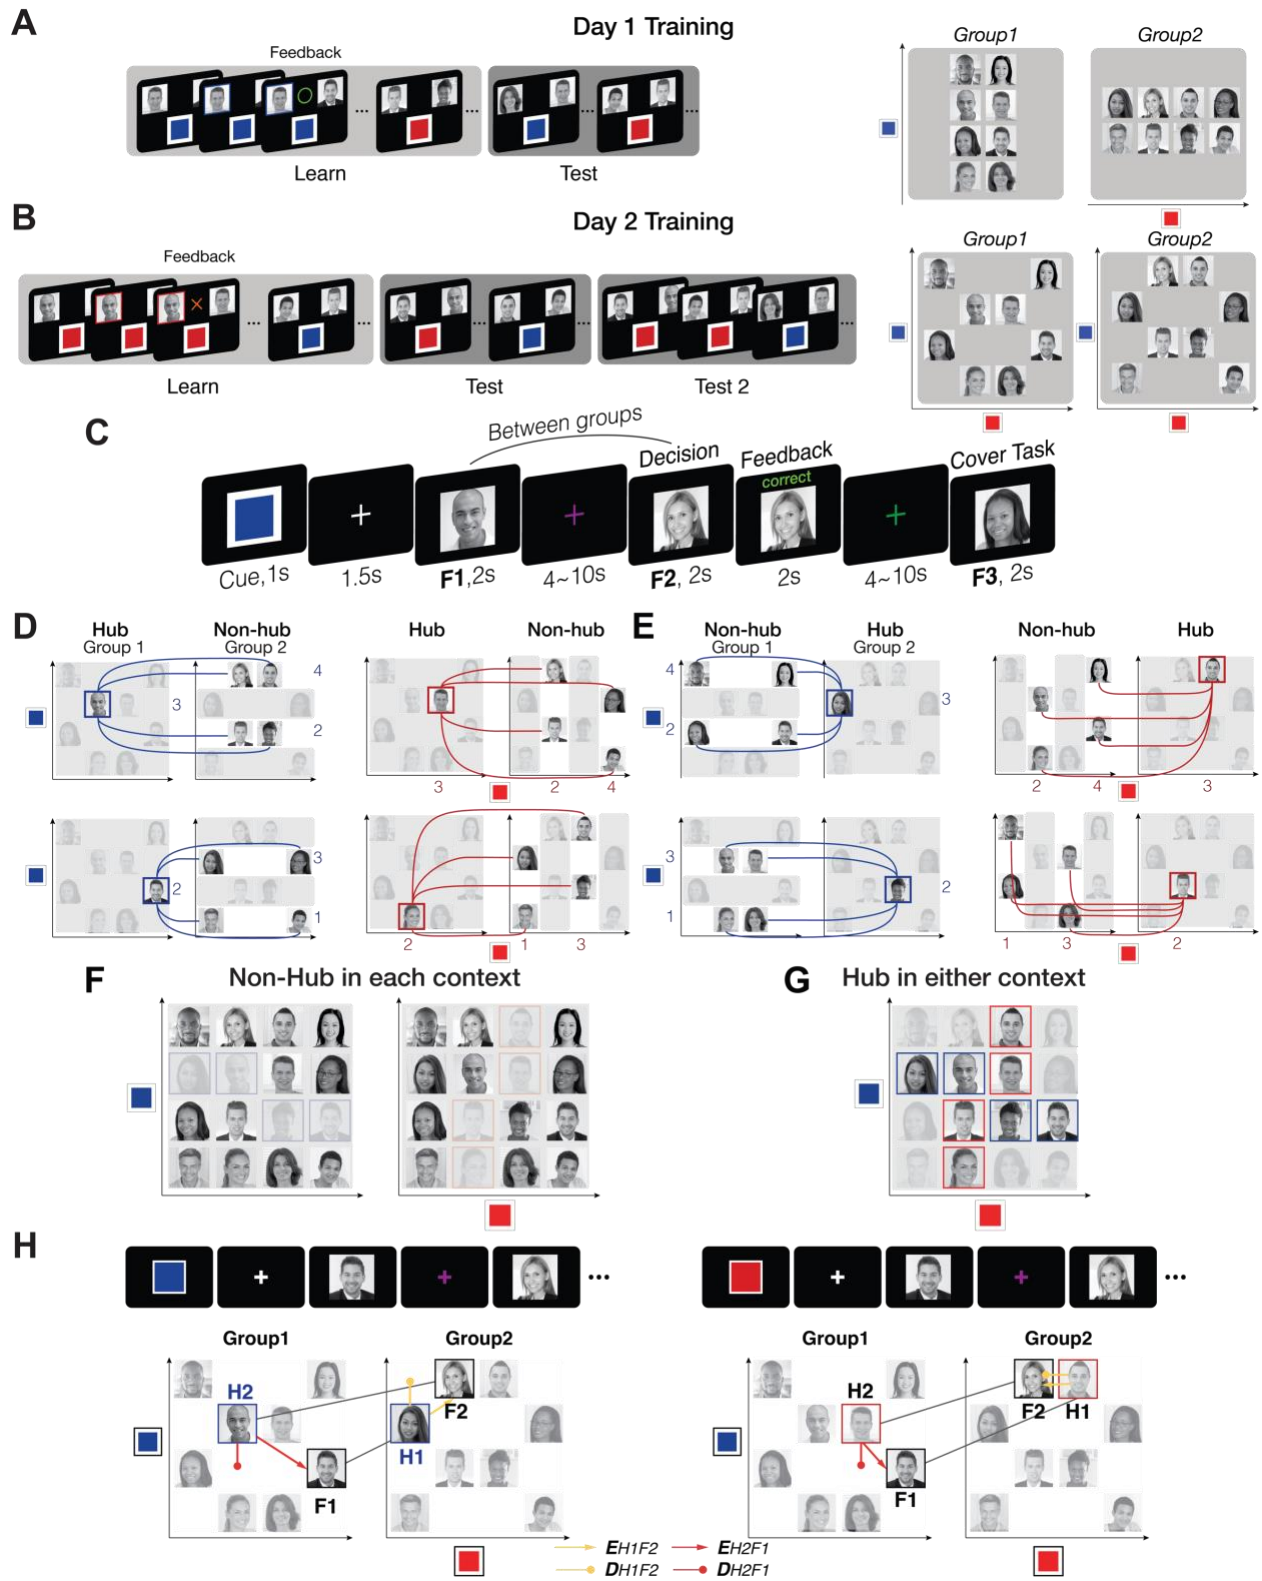

**Figure S1. Related to STAR Methods section. A-B.** Behavioral training for day 1 and day 2. **A.** During the Learn phase on day 1, participants learned the relative rank of members in each group in one of two dimensions based on feedback from binary comparisons. They were asked to choose the higher rank individual between two members in the same group who differed by one level only in the given social hierarchy dimension. During the test phase on day 1, participants were asked to infer the relationship between two in the same group who were never paired during training through transitive inferences. No feedback was given during test phase. After day 1 training, participants could have built a hierarchical structure of each of the two groups in one dimension (Right panel). **B.** During the learn phase on day 2, participants learned the relative status of members in each group in the unlearned second dimension by comparing two members in the same group who differed by one level only in the corresponding dimension. During the test phase on day 2, participants were asked to infer the relative status of unpaired individuals through transitive inference. No feedback was given during test phase. At the end of day 2 training, knowledge about within-group social hierarchies in both dimensions was tested (Test 2). During the Test 2 phase, participants were asked to infer the relative status of two individuals in the same group while both groups and dimensions were intermixed across trials. After training on day 2, participants could in principle have built a hierarchical structure of each of two groups in two dimensions (Right panel). **C-G.** Behavioral training on day 3, performed before fMRI scanning on the same day. **C.** Participants made inferences about the hierarchical relationship of two between-group individuals (F1 and F2) in a given dimension (indicated by cue color). A cover task (indicating the gender of the face stimuli, F3) followed at the end of every trial. **D (E).** F1 and F2 pairs were selected as follows. In Group 2 (*Group 1*), four individuals whose rank are the 1<sup>st</sup> or the 3<sup>rd</sup> in the given dimension are paired specifically to a face stimulus in the other group, Group 1 (*Group 2*), whose rank is the 2<sup>nd</sup> in the given dimension. The remaining four individuals in Group 2 (*Group 1*) whose rank are the 2<sup>nd</sup> or the 4<sup>th</sup> are specifically paired with another member in the other group, Group 1 (*Group 2*), whose rank is the 3<sup>rd</sup> in the dimension. This is also true in the other dimension (Right panels). We called the individuals in Group 1 (*Group 2*) who had been paired with four other individuals in Group 2 (*Group 1*) ‘hubs’. For each trial of the hub learning phase, therefore, participants were asked to make a binary decision comparing between-group individuals including one hub individual who differed by one level on the given dimension. **F.** In each dimension, twelve individuals play a role of ‘non-hub’. In fMRI, participants were asked to infer the relative status between non-hub individuals in different groups who had not been directly paired during training. The left panel shows individuals who were shown in the popularity dimension, and the right panel shows individuals who were shown in the competence dimension. **G.** Eight individuals play a role as hubs. Among four hubs in each group, two hubs were for the competence dimension (highlighted in red); two hubs were for the popularity dimension (highlighted in blue). **H.** Importantly, hubs in one dimension differ from those in the other dimension, which means that to make an accurate inference of the relative status of the same pair of individuals in the two different dimensions during the fMRI task, participants needed to retrieve different hubs, which would alter the inference trajectories (e.g. inferring relative status of the same pair individuals, F1-F2 in popularity dimension on left and competence dimension on right).

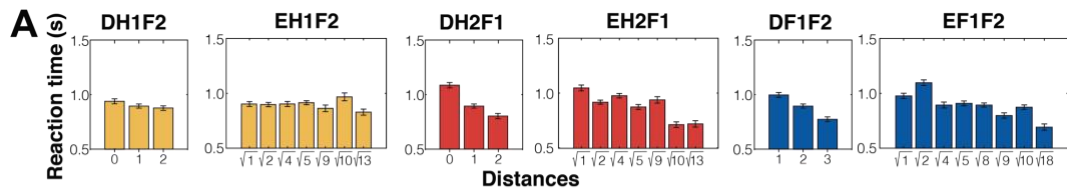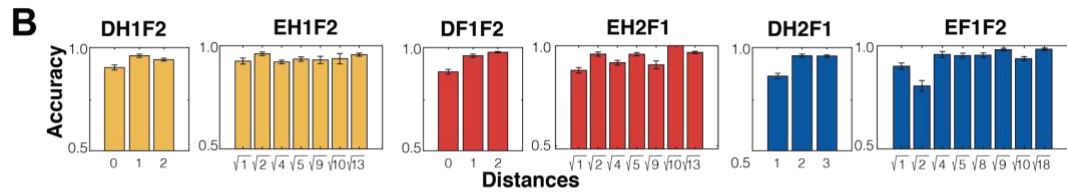

**C** RT explained by distances

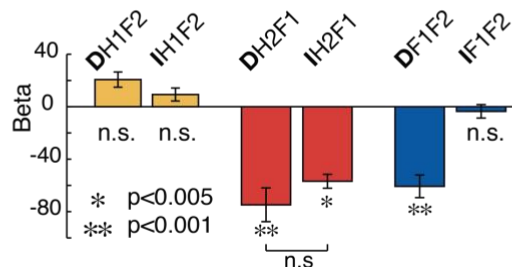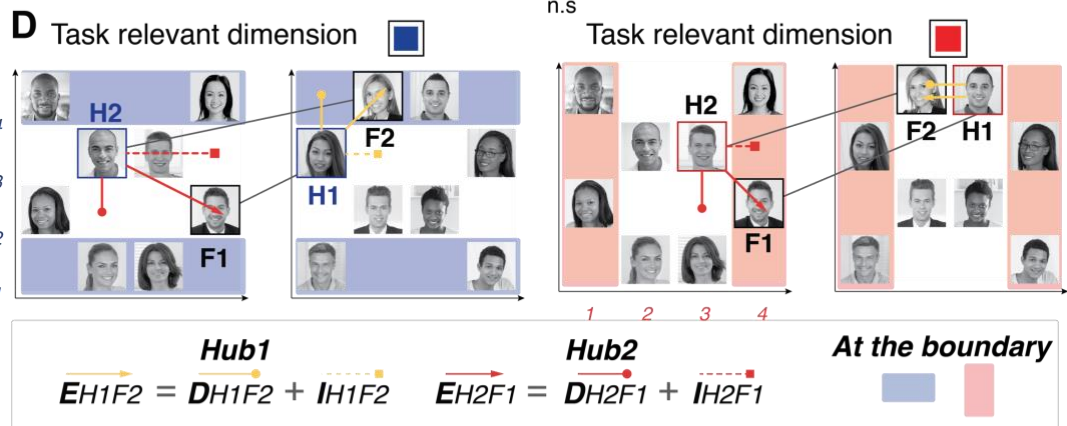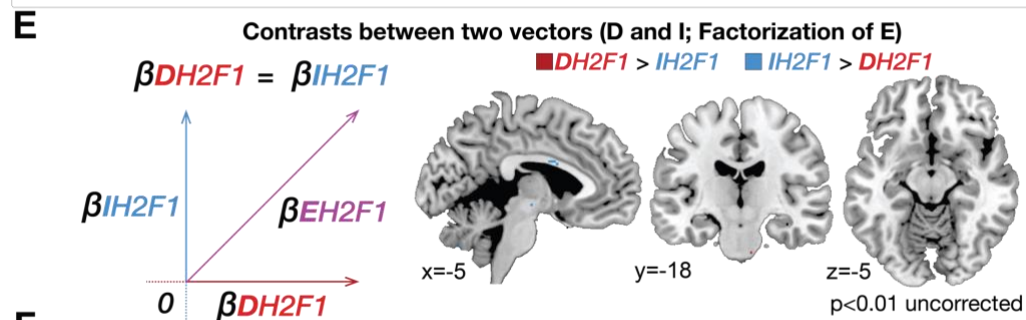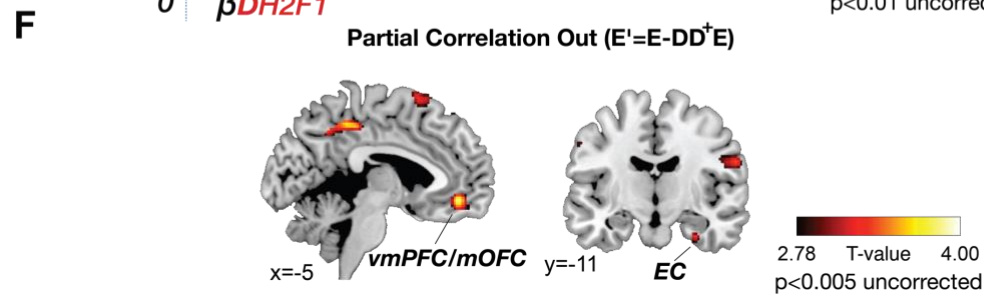

**Figure S2. Related to Figures 2 and 3.** **A.** Changes in reaction time (RT) in inferences as a function of distances of different types of inference trajectories. Note these RT plots do not control for the alternative distance metrics, as the regression analyses do. **B.** Changes in accuracy (% correct) in inferences made in fMRI experiments as a function of distances of different types of inference trajectories. **C.** We performed an additional multiple linear regression in which the 1-D distances in task-irrelevant dimension (I) were entered as an alternative regressor instead of E (due to the collinearity between E and the sum of D and I). Because E is factorized with two orthogonal vectors, D and I, this analysis allowed us to examine the effects of the D and I without potential collinearity issues between regressors. We found the effects of both 1-D distances from H2 ( $D_{H2F1}$  and  $I_{H2F1}$ ), consistent with the finding that  $E_{H2F1}$  explains variance in RT over and above  $D_{H2F1}$ . We also found that the effect of  $D_{H2F1}$  was not different from the effect of  $I_{H2F1}$  (paired t-test,  $t_{26}=-1.64$ ,  $p=0.11$ ). These additional behavioral results show that participants preferentially recall H2 as the task-relevant hub to aid in the comparison between novel pairs of faces, with the Euclidean distance to H2 explaining variance over and above the 1-D distance alone. **D.** In association with **Fig. 2F**. To test for alternative routes and confirm our behavioral results, we performed several additional analyses. We found that  $E_{H2F1}$  accounted for variation in RTs better than  $E_{H1F2}$  ( $t_{26}=-2.73$ ,  $p=0.01$ , paired t-test), which did not show a significant effect on RT ( $\beta E_{H1F2}=13.5\pm 5.5$ ,  $t_{26}=1.0$ ,  $p=0.33$ ). Importantly, we also found that the effects of  $E_{H2F1}$  were not different for the trials in which either or both of F1 and F2 was at the highest or lowest rank (i.e. boundary ranks) in the hierarchy compared to the other trials ( $t_{26}=-0.53$ ,  $p=0.60$ , paired t-test), and there was a significant effect of the distance for both non-boundary ( $t_{26}=-7.68$ ,  $p=3.7e-08$ ) and boundary trials ( $t_{26}=-6.36$ ,  $p=9.8e-07$ ). **E.** The contrast analysis between positive effects of  $D_{H2F1}$  and positive effects of  $I_{H2F1}$ . This reveals that no brain area preferentially encoded  $D_{H2F1}$  or  $I_{H2F1}$  over the other even at a liberal threshold ( $p>0.01$ , uncorrected). These findings support the conclusion that the brain areas revealed in the conjunction analysis (vmPFC/mOFC and EC in **Fig. 3C**) encode both  $D_{H2F1}$  or  $I_{H2F1}$  with similar weights, consistent with the interpretation that the vmPFC/mOFC and EC encode the Euclidean distance ( $E_{H2F1}$ ). **F.** The effect of  $E'_{H2F1}$  which denotes  $E_{H2F1}$  after partialling out the 1-D task-relevant distance,  $D_{H2F1}$ :  $E' = E - DD^+E$ , where  $D^+$  is the Moore-Penrose generalized matrix inverse ( $D^+ = pinv(D)$ ). We found the effects of  $E'_{H2F1}$  in vmPFC/mOFC ( $[x,y,z]=[6,42,-14]$ ,  $t_{26}=3.75$ , and  $[x,y,z]=[-12,24,-20]$ ,  $t_{26}=3.72$ ) and EC ( $[x,y,z]=[30,-14,-30]$ ,  $t_{26}=3.35$ ) ( $p_{TFCE}<0.05$ ). For visualization purposes, the whole-brain maps are thresholded at  $p<0.005$  uncorrected.

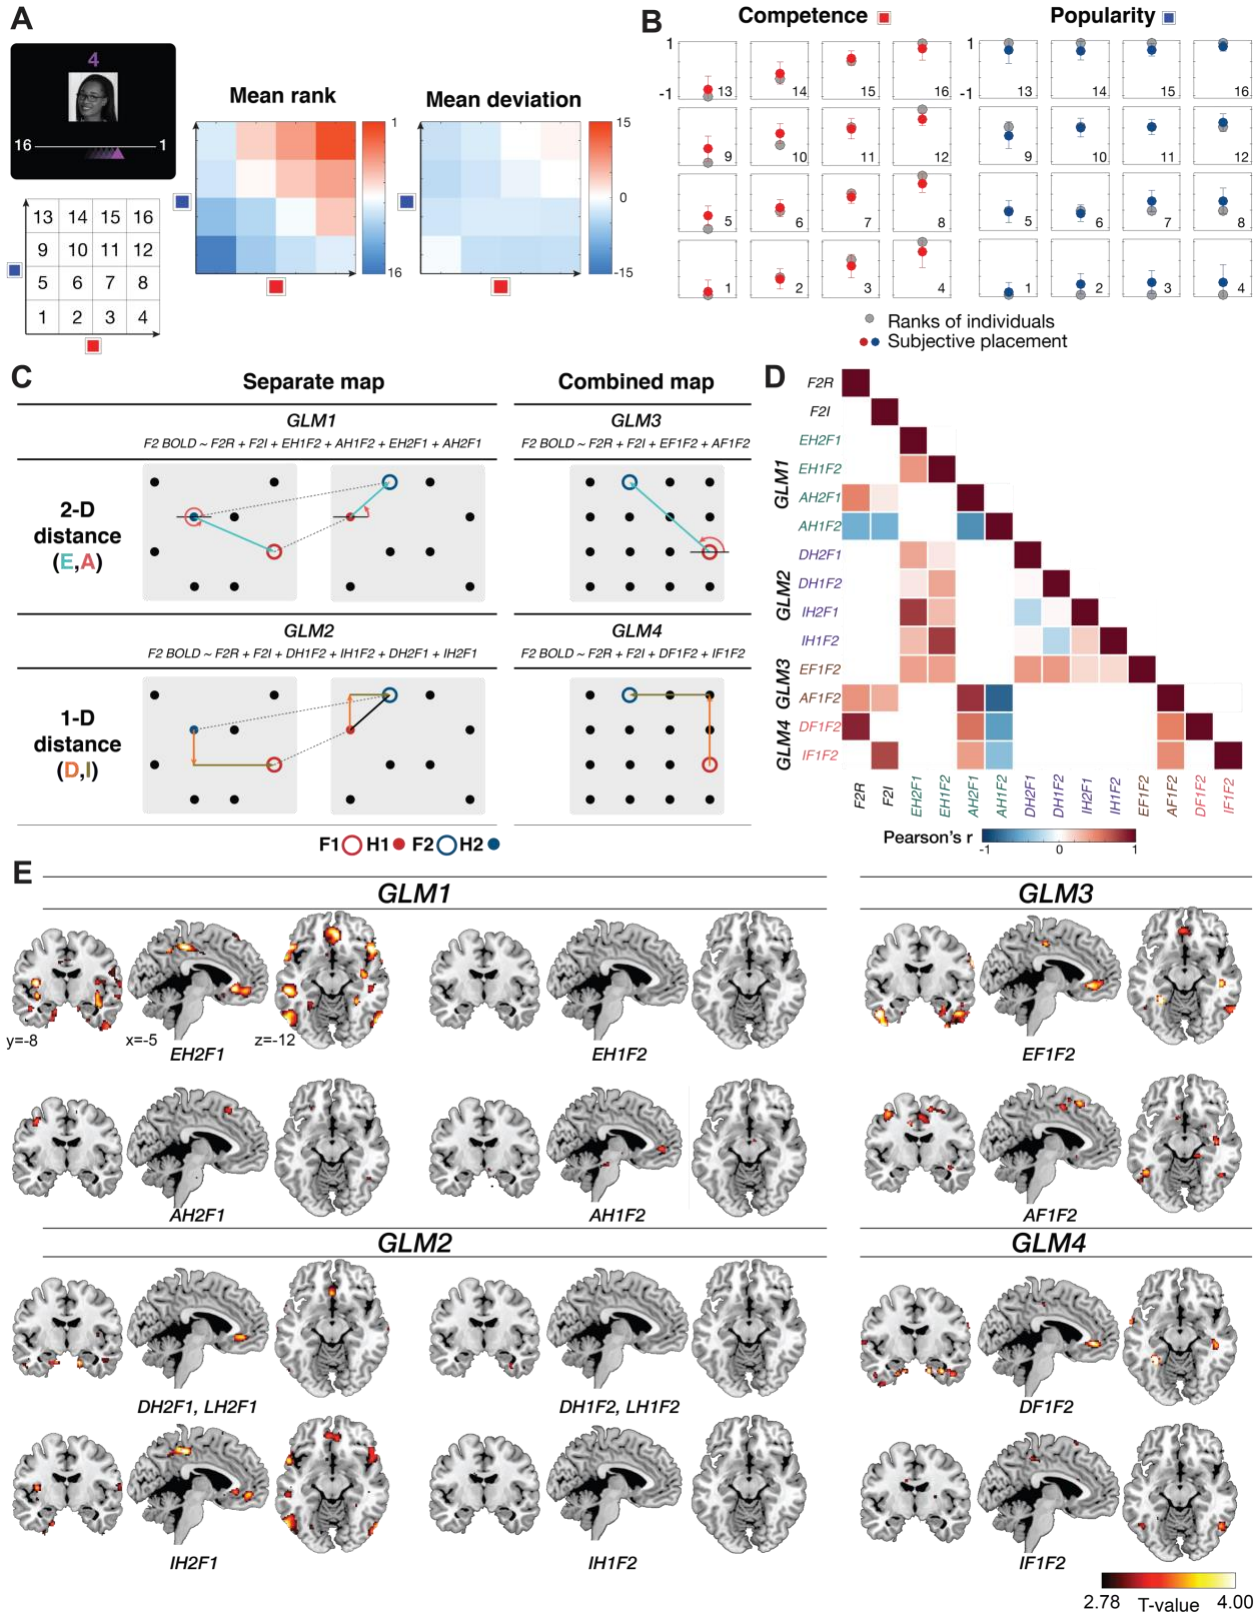

**Figure S3. Related to Figure 3. A.** To ensure that the behavioral training procedure was sufficient to construct a map-like representation, we performed a separate behavioral experiment on a separate group of participants. A separate group of subjects ( $n=18$ ) who did not participate in the fMRI part of the experiment performed alternative tasks on day 3, after learning between-group relationships through hubs. Alternative tasks were designed to investigate whether participants can construct a combined cognitive map of 16 individuals (two eight-member groups) according to their ranks in two hierarchy dimensions. During the behavioral version of inference task participants were asked to rank the 16 individuals according to their 'growth potential (GP)'. We gave the instruction that to compute GP accurately, participants need to weight the ranks in the two dimensions equally. Each of the individuals was presented three times in random order, and participants indicated their rank by moving the cursor on the screen without any time limit (left panel). Mean reported rank (middle panel) and the mean deviation (reported rank - actual rank in GP; right panel) are shown. Participants were able to integrate values from the two dimensions into a single integrated rank value. **B.** Participants were asked to place each individual in a 2-D plane where the vertical axis represents the competence dimension and the horizontal axis represents the popularity dimension. 16 face stimuli were shown in a random position. Participants were asked drag-and-drop each of the face stimuli to place them in another position according to their ranks. Responses of each participant were normalized in a range from -1 to 1 by maximum vertical and horizontal distances. The red and blue colored dots indicate the mean position ( $\pm$  s.e.m) of each face stimulus, and the grey dots represent their correct position. To establish this was also true for our fMRI subject sample, we analyzed responses during the test 2 blocks on day 2 training in which participants were asked to make flexible inferences in intermixed behavioral contexts without feedback. While there were four rank levels per dimension, distinguishing rank levels 2 and 3 was not simply be explained by differences in win frequency, since these people each "won" and "lost" on  $\frac{1}{2}$  of trials. We confirmed that fMRI participants were also able to choose the superior rank face between rank levels 2 and 3 for within-group comparisons:  $92.87 \pm 0.89\%$  accuracy ( $t_{26}=49.13$ ,  $p < 0.001$ , one-sample t-test). This performance was not different from other pairs (level 1 vs. 2 and level 3 vs. 4) also having one-level rank difference ( $F_{2,78}=0.66$ ,  $p=0.52$ , one-way ANOVA). **C.** Four general linear models (GLMs) are depicted to examine the structure the brain constructs to represent social hierarchies and uses to make an inference of relative ranks between F1 and F2. GLM1 tests whether the brain constructs a separate map for each of the two groups and encodes the Euclidean distance from the hub (E) and vector angles between the hub and the connected face (A). GLM2 tests whether the brain constructs a separate map of each group and encodes the one-dimensional (1-D) rank distance in task-relevant dimension (D) and 1-D rank distance in task-irrelevant dimension (I). GLM3 tests whether the brain constructs a combined map and encodes the Euclidean distance (E) and vector angle (A) between F1 and F2. GLM4 tests whether the brain constructs a combined map and encodes D and I between F1 and F2. The task-relevant rank of F2 (F2R) and the task-irrelevant rank (F2I) were also included to model the BOLD signals at the time of F2 presentation, in addition to other common regressors (See Methods). **D.** The cross-correlation (Pearson's  $r$ ) between different distance metrics for each GLM. In this study, compared to the distance in task-relevant dimension ( $D_{H2F1}$  and  $D_{H1F2}$ ), the distances in the task-irrelevant dimension from the hubs ( $I_{H2F1}$  and  $I_{H1F2}$ ) had a greater correlation with the Euclidean distances from hubs ( $E_{H2F1}$  and  $E_{H1F2}$ ). This was because the distances in the task-irrelevant dimension had a larger variance (I; in a range of

0 to 3) than the distances in the task-relevant dimension from the hubs (D; in a range of 0 to 2), owing to the requirement that hubs were positioned at either rank 2 or 3 in the task-relevant dimension (**Fig. S1D and E**). **E**. In association with **Fig. 3**. Whole-brain univariate parametric analyses showing neural correlates of each of the distance metrics that could have theoretically driven inferences between novel pairs of individuals at the time of decision-making (F2 presentation). We do note that there was modest evidence that HC activity reflected the vector angle  $A_{F1F2}$  (peak  $[x,y,z]=[38,-12,-16]$ ,  $t_{26}=3.56$ ,  $p<0.001$  uncorrected; this effect did not survive at the threshold,  $p_{TFCE}<0.05$  in an *a priori* HC ROI), consistent with a previous report (Tavares et al., 2015).



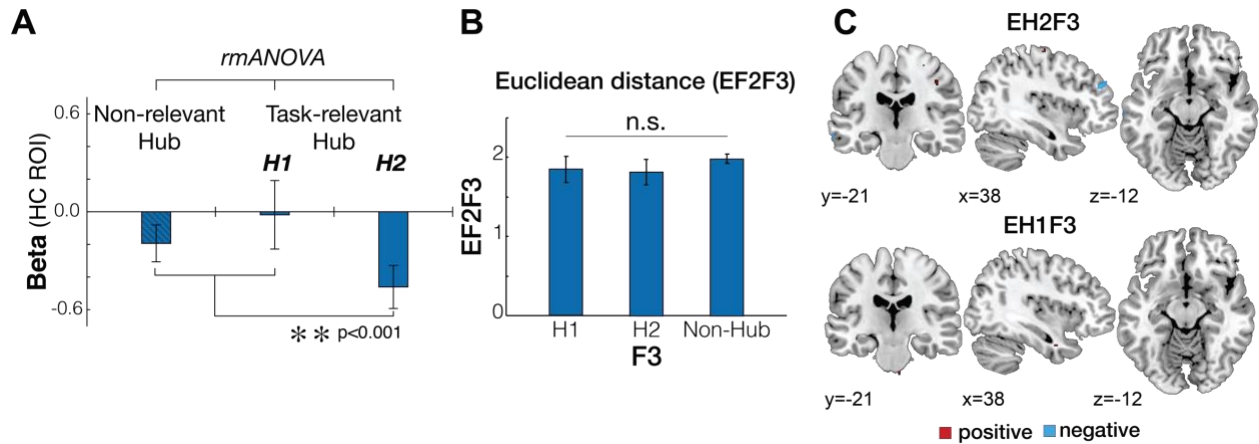

**Figure S4. Related to Figure 4. A.** In association with **Fig.4**. We performed additional confirmatory analyses on the repetition suppression (RS) effects to support our main results shown in **Fig. 4**. To test whether the activity in the right HC differed significantly according to which type of hub (H1, H2, or non-relevant hub) was shown at F3 presentation, we performed a repeated-measures ANOVA, which revealed a significant effect of hub type (Wilks'  $\lambda=.553$ ,  $F_{2,25}=10.11$ ,  $p=0.001$ , rmANOVA in the independent, anatomically defined ROI). *Post-hoc* paired *t*-tests between conditions showed a significant effect specific for the relevant H2 compared to all non-relevant hubs ( $\beta=0.27\pm 0.06$ ;  $t_{26}=4.54$ ,  $p<0.001$ ), but not between H1 and non-relevant hubs ( $\beta=-0.18\pm 0.22$ ,  $t_{26}=-0.81$ ,  $p=0.43$ ) (**Fig. 3**). Differences between H2 and H1 were marginally significant ( $\beta=-0.44\pm 0.23$ ,  $t_{26}=1.95$ ,  $p=0.06$ ). We did not find any brain area showing greater suppression during presentation of the other possible hub, H1 ( $\beta=-0.02\pm 0.21$  in the right HC;  $t_{26}=0.81$ ,  $p=0.43$ ), consistent with our analyses reported above, indicating that participants wait for the presentation of F2 to make a backward inference about its rank relative to F1 by preferentially retrieving H2. While this result demonstrated that participants reinstated a specific representation of H2 in the HC to make inferences, we further test whether H2 was preferentially reinstated over H1. We estimated the RS effect of H2 as the difference between the activity in the right HC for the trials in which H2 was presented at F3 compared to other trials in which either a non-relevant hub or H1 was presented at F3 and the same for H1. We found that the suppression effect in the right HC was specific to when H2 was presented compared to all the other trials ( $\beta=0.28\pm 0.06$ ,  $t_{26}=4.58$ ,  $p=1.01e-04$ ) but not when H1 was presented compared to all the other trials ( $\beta=-0.23\pm 0.22$ ,  $t_{26}=-1.05$ ,  $p=0.30$ ). The difference between the H1 and H2 suppression effects was also significant ( $\Delta\beta=-0.51\pm 0.25$ ,  $t_{26}=-2.10$ ,  $p<0.05$ ). There was no significant difference in the level of suppression between the right and left HC effects (mean difference  $\beta=-0.06\pm 0.03$ ,  $t_{26}=-0.45$ ,  $p=0.66$ , paired *t*-test). **B.** We controlled for several potential confounds during the cover task (F3 presentation). Specifically, we only presented hubs because these individuals are equally matched for win/loss frequency (each winning on  $\frac{1}{2}$  of trials and losing on the other  $\frac{1}{2}$ ) and experience (i.e. presentation frequency), thereby ruling out these potential confounding factors. Moreover, we ensured the Euclidean distance from F2 to F3 ( $E_{F2F3}$ ) was not different when F3 was H1, H2, or a non-relevant hub ( $F_2=0.77$ ,  $p=0.47$ , one-way ANOVA), in order to control for the distance between presented faces for each type of hub. **C.** The neural correlates of Euclidean distance from the potential latent hubs (H2 and H1) and F3 ( $E_{H2F3}$  and  $E_{H1F3}$ ) at the



time of F3 presentation (the brain areas showing a positive correlation are colored in red, and those showing an inverse correlation in blue,  $p < 0.005$ , uncorrected). We did not find any effects in bilateral hippocampus (HC) even at a lenient threshold,  $p < 0.01$ , uncorrected. These results suggest that HC suppression was specific to the latent hub itself, rather than driven by proximity in the Euclidean space, thus ruling out a distance-based suppression account between presented faces (Garvert et al., 2017).

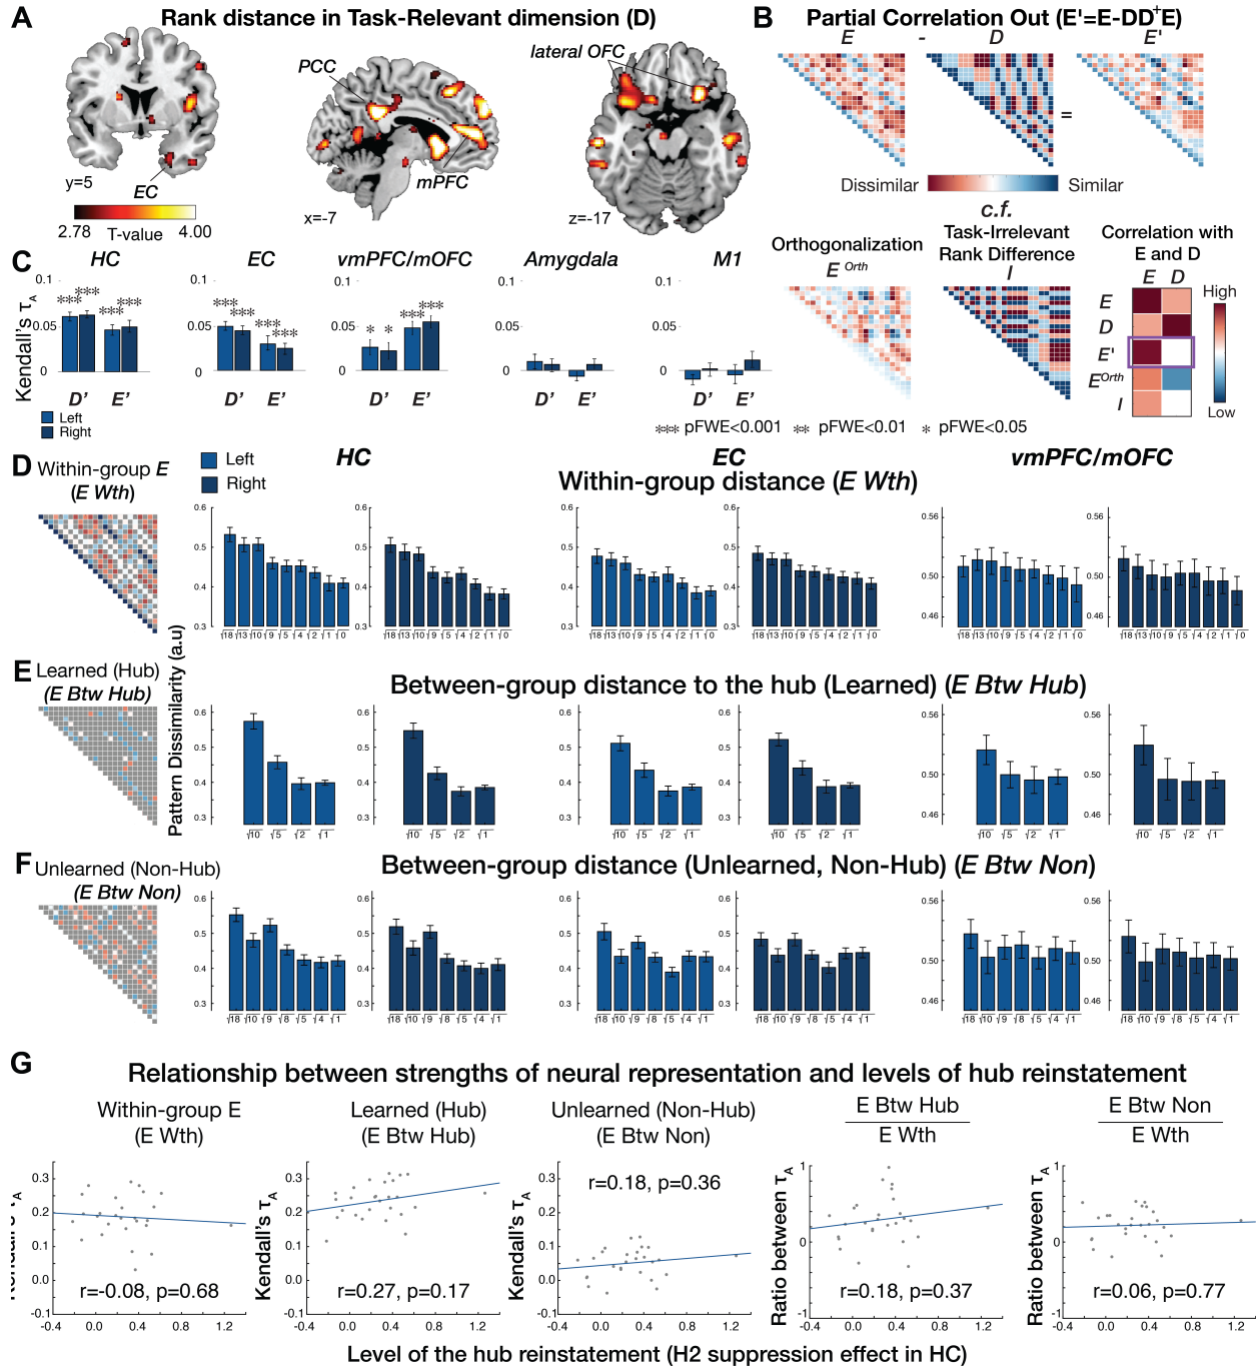

**Figure S5. Related to Figure 5.** **A.** In association with **Fig. 5E**. The dissimilarity in the neural activity pattern is explained by the pairwise differences in the rank in the task-relevant dimension ( $D$ ) (**Fig. 5B**). Whole-brain searchlight representational similarity analysis (RSA) shows effects of 1-D distance in the task-relevant dimension ( $D$ ) in the EC, lateral OFC, medial prefrontal cortex (mPFC), and posterior cingulate cortex (PCC) ( $p_{TFCE} < 0.05$ ). For visualization purposes, the whole-brain maps are thresholded at  $p < 0.005$  uncorrected. **B-C.** In association with **Fig. 5I**. **B.** We also tested if the effects were specific to each of the model RDMs ( $D$  and  $E$ ) by regressing out their covariance with the other. To do this we subtracted their partial correlation ( $E' = E - DD^+E$ , where

$D^+$  is the Moore-Penrose generalized matrix inverse ( $D^+ = pinv(D)$ ). Specifically,  $E'$  was computed as  $E$  after regressing out its partial correlation with  $D$ . Likewise,  $D'$  is  $D$  after partialling out its covariance with  $E$ . Importantly,  $E'$  highly correlates with  $E$  but not with  $D$  anymore. This partial correlation has an advantage over other methods, such as orthogonalization:  $E$  orthogonalized by  $D$  ( $E_{Orth}$ ) which creates a negative correlation with  $D$ . Moreover,  $E'$  differs from the model representational dissimilarity matrix (RDM) created by the task-irrelevant rank differences ( $I$ ). **C.** RSA in a priori regions of interests (ROI) including the bilateral HC (Yushkevich et al., 2015), EC (Amunts et al., 2005; Zilles and Amunts, 2010), and vmPFC/mOFC (Neubert et al., 2015). The pattern dissimilarity in the brain activity estimated in *a priori* ROIs increase with  $E'$  (\*\*\*,  $p_{FWE} < 0.001$ ; \*\*,  $p_{FWE} < 0.01$ ; \*,  $p_{FWE} < 0.05$ ). Conversely, the pattern dissimilarity estimated in the amygdala and primary motor cortex (M1) was neither explained by  $D'$  nor  $E'$ . **D-G.** In association with **Fig. 5G**. With the post-hoc tests which measured the effects of Euclidean distance ( $E$ ) separately according to whether a pair was experienced with feedback during training or not, our findings suggested that two 2-D maps, one for each group, had not yet been fully integrated into a single map, and as a consequence, participants might need to retrieve the hub for inference instead of direct inference between F1 and F2 relationship. **D.** The dissimilarity between activity patterns estimated in bilateral HC, EC, and vmPFC/mOFC increases in proportion to the pairwise Euclidean distance between within-group individuals ( $E_{Wth}$ ). **E.** This is also true for the between-group pairs involving hubs ( $E_{Btw Hub}$ ). **F.** Compared to those learned relationships, the dissimilarity between activity patterns estimated between non-hub individuals was explained less strongly by  $E$  ( $E_{Btw Non}$ ), although there is a significant effect in hippocampus (HC). **G.** Individual differences in the level of hub reinstatement are unlikely to account for the strength of neural representation of the combined 2-D social hierarchy. Our findings (**D-F**) suggested that two 2-D maps, one for each group, had formed but not yet been fully integrated into a single map, and as a consequence, participants might need to retrieve the hub for inferences instead of making direct inferences between F1 and F2. An alternative possibility is that some subjects had formed a fully integrated map, but others had not and so these had to retrieve a hub to enable inferences. To test for this possibility, we examined whether individual differences in the level of integration of two social hierarchies explained the different levels of reinstatement of the task-relevant hub across individuals. We found that the levels of hub reinstatement (the size of repetition suppression effects in the right HC specifically to H2 compared to non-relevant hubs) were in fact not explained by either the strength of neural representation (rank correlation, Kendall's  $\tau_A$ ) of  $E_{Wth}$ ,  $E_{Btw Hub}$ ,  $E_{Btw Non}$ , the relative strength of the unlearned relationship compared to the learned between-group relationships (via hubs) ( $E_{Btw Hub} / E_{Wth}$ ), nor the relative strength of the unlearned relationship compared to the learned within-group relationship ( $E_{Btw Non} / E_{Wth}$ ). Taken together, these findings suggest that participants have a neural representation that was in the process of combining the two hierarchies. This pattern of findings may explain why participants needed to reinstate the task-relevant hub to make novel inferences before they had completed forming a neural representation of the fully combined hierarchy.

**A**

|                                                                   | Cluster size | T    | Z    | Peak coordinate (MNI) |     |     |
|-------------------------------------------------------------------|--------------|------|------|-----------------------|-----|-----|
|                                                                   |              |      |      | x                     | y   | z   |
| EH2F1                                                             |              |      |      |                       |     |     |
| right supramarginal gyrus /<br>temporoparietal junction           | 2500         | 7.23 | 5.31 | 62                    | -24 | 28  |
| right dorsolateral prefrontal<br>cortex / superior frontal sulcus | 35           | 6.27 | 4.85 | 24                    | 56  | 30  |
| left supramarginal gyrus /<br>temporoparietal junction            | 2451         | 6.02 | 4.72 | -62                   | -30 | 34  |
| ventromedial prefrontal cortex /<br>medial orbitofrontal cortex   | 443          | 4.82 | 4.04 | 2                     | 32  | -6  |
| right posterior middle temporal<br>gyrus                          | 429          | 4.77 | 4.01 | 62                    | -22 | -22 |
| left insula                                                       | 62           | 4.53 | 3.86 | -38                   | -6  | 10  |
| right insula                                                      | 765          | 4.43 | 3.79 | 36                    | 0   | 8   |
| right lateral orbitofrontal cortex                                | 42           | 4.12 | 3.58 | 30                    | 34  | -18 |
| right parahippocampal cortex                                      | 14           | 4.04 | 3.53 | 22                    | -20 | -26 |
| right superior temporal gyrus                                     | 31           | 3.61 | 3.22 | 56                    | -32 | 6   |
| left posterior middle temporal<br>gyrus                           | 14           | 3.21 | 2.92 | -60                   | -52 | -20 |

**B**

| DH2F1                                                 |      |      |      |     |     |     |
|-------------------------------------------------------|------|------|------|-----|-----|-----|
| left supramarginal gyrus /<br>tempoparietal junction  | 968  | 9.43 | 6.16 | -62 | -20 | 28  |
| right supramarginal gyrus /<br>tempoparietal junction | 557  | 7.24 | 5.31 | 60  | -26 | 28  |
| IH2F1                                                 |      |      |      |     |     |     |
| left supramarginal gyrus /<br>tempoparietal junction  | 2633 | 6.18 | 4.8  | -62 | -30 | 36  |
| right supramarginal gyrus /<br>tempoparietal junction | 1677 | 5.78 | 4.59 | 62  | -24 | 26  |
| right posterior middle temporal<br>gyrus              | 659  | 4.86 | 4.06 | 58  | -66 | -2  |
| left posterior middle temporal<br>gyrus               | 232  | 4.39 | 3.76 | 28  | 36  | -18 |
| right inferior frontal gyrus                          | 182  | 4.26 | 3.67 | 62  | 8   | 12  |
| left temporal pole                                    | 12   | 3.93 | 3.45 | -56 | 12  | -10 |
| right inferior frontal gyrus                          | 16   | 3.77 | 3.33 | -60 | 4   | 12  |

**Table S1. Related to Figure 3.** Results of univariate fMRI analysis (**Fig. 3A.**) **A.** Neural activity during choices modulated by the Euclidean distance of inference trajectories via the hub ( $E_{H2F1}$ ). **B.** Neural activity during choices modulated by the rank difference in the task-relevant dimension ( $D_{H2F1}$ ) and the rank difference in the task-irrelevant dimension ( $I_{H2F1}$ ) from the hub (1-D distance of inferences). All reported effects use threshold-free cluster enhancement (TFCE) corrected at  $p_{TFCE} < 0.05$ .

|                                                                       | Route through H2 |       |       |       |
|-----------------------------------------------------------------------|------------------|-------|-------|-------|
|                                                                       | EH2F1            | DH2F1 | IH2F1 | AH2F1 |
| left Entorhinal Cortex                                                | <b>0.82</b> ♦    | 0.03  | 0.01  | 0.01  |
| right Entorhinal Cortex                                               | <b>0.91</b> ♦    | 0.00  | 0.00  | 0.00  |
| left ventromedial prefrontal cortex /<br>medial orbitofrontal cortex  | <b>0.89</b> ♦    | 0.02  | 0.00  | 0.01  |
| right ventromedial prefrontal cortex /<br>medial orbitofrontal cortex | <b>0.85</b> ♦    | 0.03  | 0.00  | 0.01  |

  

|                                                                       | Route through H1 |       |       |       |
|-----------------------------------------------------------------------|------------------|-------|-------|-------|
|                                                                       | EH2F1            | DH2F1 | IH2F1 | AH2F1 |
| left Entorhinal Cortex                                                | 0.02             | 0.02  | 0.00  | 0.04  |
| right Entorhinal Cortex                                               | 0.00             | 0.00  | 0.00  | 0.08  |
| left ventromedial prefrontal cortex /<br>medial orbitofrontal cortex  | 0.01             | 0.01  | 0.00  | 0.03  |
| right ventromedial prefrontal cortex /<br>medial orbitofrontal cortex | 0.01             | 0.03  | 0.00  | 0.03  |

  

|                                                                       | Direct Route from F1 to F2 |       |       |       |
|-----------------------------------------------------------------------|----------------------------|-------|-------|-------|
|                                                                       | EH2F1                      | DH2F1 | IH2F1 | AH2F1 |
| left Entorhinal Cortex                                                | 0.02                       | 0.01  | 0.00  | 0.02  |
| right Entorhinal Cortex                                               | 0.00                       | 0.00  | 0.00  | 0.00  |
| left ventromedial prefrontal cortex /<br>medial orbitofrontal cortex  | 0.00                       | 0.01  | 0.00  | 0.01  |
| right ventromedial prefrontal cortex /<br>medial orbitofrontal cortex | 0.01                       | 0.01  | 0.00  | 0.01  |

**Table S2. Related to Figure 3.** Exceedance probability (XP) computed from Bayesian model selection (in association with **Fig. 3B.**) ♦ indicates the winning model, indicating that E<sub>H2F1</sub> explains the variance of the activity in the ROI better than other different distance measures.



**A**

| ROIs             | Euclidean (E)   | 1-D Relevant rank diff. (D) | 1-D Irrelevant rank diff. (I) | Context (C)  | Group (G)    |
|------------------|-----------------|-----------------------------|-------------------------------|--------------|--------------|
| HC left          | 0.091±0.007 *** | 0.078±0.005 ***             | 0.051±0.006***                | -0.002±0.004 | 0.018±0.007  |
| HC right         | 0.095±0.007 *** | 0.081±0.004 ***             | 0.048±0.005***                | 0.004±0.003  | 0.012±0.008  |
| EC left          | 0.066±0.009 *** | 0.064±0.005 ***             | 0.031±0.005***                | 0.001±0.003  | 0.010±0.009  |
| EC right         | 0.059±0.007 *** | 0.057±0.005 ***             | 0.033±0.004***                | -0.006±0.003 | 0.011±0.007  |
| vmPFC/mOFC left  | 0.064±0.007 *** | 0.048±0.008 ***             | 0.049±0.009*                  | 0.015±0.008  | -0.001±0.005 |
| vmPFC/mOFC right | 0.067±0.008 *** | 0.046±0.009 ***             | 0.044±0.009*                  | 0.014±0.007  | -0.006±0.006 |
| Amygdala left    | 0.003±0.008     | 0.008±0.009                 | 0.010±0.007                   | -0.002±0.008 | 0.009±0.008  |
| Amygdala right   | 0.008±0.006     | 0.007±0.007                 | 0.019±0.008                   | -0.004±0.006 | 0.002±0.007  |
| Motor left       | -0.008±0.012    | -0.013±0.007                | 0.002±0.011                   | 0.002±0.006  | 0.009±0.007  |
| Motor right      | 0.009±0.010     | 0.003±0.007                 | 0.008±0.007                   | -0.003±0.006 | -0.008±0.007 |

**B**

| ROIs             | Within-Group E  | Between-group (Hub) E | Between-group (NonHub) E |
|------------------|-----------------|-----------------------|--------------------------|
| HC left          | 0.182±0.010 *** | 0.237±0.010 ***       | 0.053±0.009 ***          |
| HC right         | 0.188±0.012 *** | 0.235±0.010 ***       | 0.051±0.009 ***          |
| EC left          | 0.160±0.011 *** | 0.241±0.012 ***       | 0.031±0.011              |
| EC right         | 0.149±0.012 *** | 0.253±0.012 ***       | 0.024±0.011              |
| vmPFC/mOFC left  | 0.066±0.011 *** | 0.173±0.018 ***       | 0.000±0.014              |
| vmPFC/mOFC right | 0.067±0.011 *** | 0.184±0.019 ***       | -0.001±0.012             |

**C**

| ROIs             | Within-Group E vs. Between-group NonHub E | Between-group Hub E vs. NonHub E |
|------------------|-------------------------------------------|----------------------------------|
| HC left          | 4.54 ***                                  | 4.54 ***                         |
| HC right         | 4.54 ***                                  | 4.54 ***                         |
| EC left          | 4.52 ***                                  | 4.54 ***                         |
| EC right         | 4.37 ***                                  | 4.54 ***                         |
| vmPFC/mOFC left  | 3.41 ***                                  | 4.37 ***                         |
| vmPFC/mOFC right | 3.39 ***                                  | 4.54 ***                         |

**Table S3. Related to Figure 5.** Representational similarity analysis (RSA) in the region of interests (ROIs). **A.** In association with **Fig. 5C**, the mean rank correlation (Kendall's  $\tau_A \pm$  s.e.m), which indicates the relatedness of the representational dissimilarity matrix (RDM) estimated in

each ROI to the model RDM (*E, D, I, C, and G*) **B**. In association with **Fig. 5G**. The effect of *E* (rank correlation, Kendall's  $\tau_A \pm$  s.e.m) was separately estimated for the within-group pairs, the between-group pairs of hubs (a hub and the faces that were directly paired with the hub), and the between-group pairs of non-hubs. **C**. In association with **Fig. 5G**. The z-values computed from two-sided Wilcoxon signed-rank test which shows that the effect of *E* was stronger for within-group pairs and between-group pairs of hubs compared to the effect of *E* for between-group pairs of non-hubs in the ROIs. All FWE corrected with Bonferroni-Holm method for multiple comparisons, \*\*\*  $p_{FWE} < 0.001$ , \*\*  $p_{FWE} < 0.01$ , \*  $p_{FWE} < 0.05$ .

**A**

| Model RDM                                 | Cluster size | T    | Z    | Peak coordinate (MNI)           |     |     |
|-------------------------------------------|--------------|------|------|---------------------------------|-----|-----|
|                                           |              |      |      | x                               | y   | z   |
|                                           |              |      |      | Pairwise Euclidean distance (E) |     |     |
| right central/medial orbitofrontal cortex | 644          | 5.00 | 4.15 | 12                              | 42  | -20 |
| right subgenual area                      | 481          | 4.97 | 4.13 | 12                              | 14  | -20 |
| right entorhinal cortex                   | 32           | 4.78 | 4.01 | 20                              | 0   | -36 |
| left lateral orbitofrontal cortex         | 917          | 4.41 | 3.77 | -24                             | 26  | -18 |
| right hippocampus                         | 193          | 4.37 | 3.75 | 30                              | -6  | -18 |
| posterior cingulate cortex                | 208          | 3.88 | 3.42 | -4                              | -44 | 30  |
| posterior/medial cingulate cortex         | 315          | 3.76 | 3.33 | 2                               | -26 | 38  |
| right lateral orbitofrontal cortex        | 127          | 3.09 | 2.82 | 28                              | 24  | -18 |
| right visual cortex                       | 717          | 3.02 | 2.77 | 22                              | -78 | 10  |

**B**

| Model RDM                                           | Pairwise rank difference in the task-relevant hierarchy (D) |      |      |     |     |     |
|-----------------------------------------------------|-------------------------------------------------------------|------|------|-----|-----|-----|
| bilateral medial prefrontal cortex / subgenual area | 483                                                         | 5.32 | 4.34 | -12 | 18  | -10 |
| bilateral posterior cingulate cortex                | 578                                                         | 5.27 | 4.31 | -4  | -40 | 30  |
| bilateral dorsomedial prefrontal cortex             | 4483                                                        | 5.09 | 4.20 | -10 | 52  | 10  |
| bilateral precuneus                                 | 734                                                         | 4.72 | 3.97 | 10  | -52 | 6   |
| left temporoparietal junction                       | 38                                                          | 4.64 | 3.92 | -56 | -36 | 40  |
| left lateral orbitofrontal cortex                   | 1365                                                        | 4.57 | 3.88 | -38 | 16  | -10 |
| right inferior frontal gyrus                        | 45                                                          | 4.43 | 3.79 | 62  | 18  | 14  |
| right lateral orbitofrontal cortex                  | 231                                                         | 4.28 | 3.69 | 28  | 22  | -18 |
| right dorsolateral prefrontal cortex                | 107                                                         | 4.24 | 3.66 | 24  | 64  | 20  |

**C**

| Model RDM                                 | Partiallying out D from the RDM for E (E') |      |      |     |     |     |
|-------------------------------------------|--------------------------------------------|------|------|-----|-----|-----|
| bilateral posterior cingulate cortex      | 13508                                      | 4.46 | 3.81 | -16 | -32 | 50  |
| right central/medial orbitofrontal cortex | 348                                        | 4.27 | 3.68 | 10  | 42  | -18 |

|                               |     |      |      |     |     |     |
|-------------------------------|-----|------|------|-----|-----|-----|
| dorsomedial prefrontal cortex | 82  | 4.10 | 3.57 | 8   | 58  | 36  |
| left precuneus                | 832 | 3.77 | 3.34 | -24 | -18 | 58  |
| left fusiform gyrus           | 154 | 3.46 | 3.11 | -32 | -44 | -16 |
| left visual cortex            | 199 | 3.26 | 2.96 | -42 | -86 | 18  |
| right hippocampus             | 26  | 2.8  | 2.6  | 38  | -24 | 2   |

**Table S4. Related to Figure 5.** Whole-brain searchlight representational similarity analysis (RSA). **A.** Brain regions in which the representational dissimilarity matrix (RDM) estimated by the searchlight analysis was predicted by the model RDM of pairwise Euclidean distances on the 2-D social space ( $E$ ), (in association with **Fig. 5H**). **B.** Regions predicted by the model RDM of pairwise differences in the rank in the task-relevant dimension ( $D$ ), (in association with **Fig. S5A**). **C.** Regions predicted by the model RDM of  $E'$  (in association with **Fig. 5I**).  $E'$  indicates  $E$  after partialing out confounding covariance with  $D$  (**Fig. S5B**).
